# Supplementary material
Source: PubMed Central journal article supplement (PMC7186460)
Supplement: JB.00721-19-s0001.pdf [file JB.00721-19-s0001.pdf]

## **Supplementary File 1.**

Multiple and overlapping functions of quorum sensing proteins for cell specialization in *Bacillus* species.

Abel Verdugo, Gabriela Gastélum, Jorge Rocha, Mayra de la Torre.

### **Methods for phylogenetic reconstruction of Rap- and NprR- Like proteins and homologs search.**

#### **Phylogenetic reconstruction**

Amino acid sequences of NprR- and Rap- like proteins were obtained from a previous work (1). From this dataset, we excluded sequences from eukaryotic organisms and then classified the remaining sequences in the following taxas: Actinobacteria, Aquificae, Bacteroidetes, Cyanobacteria, Clostridia, Eryspelotrichia, Lactobacillales, Other Bacillales, *Bacillus cereus* group, *Bacillus subtilis* group and other *Bacillus*. The *B. cereus* group includes all sequences from *B. anthracis*, *B. cereus*, *B. thuringiensis*, *B. mycoides*, *B. pseudomycoides*, *B. cytotoxicus* and *B. weihenstephanensis*. The *B. subtilis* group comprises all sequences from *B. subtilis*, *B. amyloliquefaciens*, *B. licheniformis*, *B. atrophaeus*, *B. mojavensis*, *B. sonorensis*, *B. tequilensis* and *B. vallismortis*. Sequences with insufficient data to be classified into any of these categories were excluded. For each tree, sequences were aligned using the Auto strategy of MAFFT v. 7 (2). Both phylogenies were then constructed in PhyML 3.0 (3) using the automatic model selection SMS (4), with the Akaike Information Criterion and the Approximate Likelihood-Ratio Test for Branches (aLRT) to support branches (5). For better visualization, individual branches were collapsed into the categories mentioned above.

## **NprR and Rap homologs search**

We conducted BlastP searches for identifying homologs of NprR and Raps. For NprR, we queried the NprR sequence of *B. thuringiensis* 407 (AFV16330.1) against the dataset used for the phylogenetic reconstructions using the Blast2 online tool (6). This sequence was also queried against the NCBI Nucleotide collection (nr/nt) database (as of January 2020). NprR homolog sequences were identified as hits above  $\geq 70\%$  of identity. For Raps, we queried the RapH sequence of *B. subtilis* (WP\_003243267.1) against the dataset used for the phylogenetic reconstructions. Rap homolog sequences were recognized as such when the BlastP results showed  $\geq 60\%$  of query cover with the query sequence and  $\geq 20\%$  of identity for Rap.

## **Supplementary File 2 Description.**

**Sheet 1-2.** Delta-BLAST results for NprR (sheet 1) and Rap (sheet 2) queries from (1), used as dataset for phylogenetic reconstructions.

**Sheet 3-4.** NprR (sheet 3) and Rap (sheet 4) homolog sequence search in the dataset used for phylogenetic reconstructions. # Hit column represents the sequence hit number from sheets 1-2 (1). Identifier column: Actino, Actinobacteria; Aqui, Aquificae; Bact, Bacteroidetes; Cyano, Cyanobacteria; Proteo, Proteobacteria; Clos, Clostridia; Ery, Erysipelotrichia; LB, Lactobacillales; NBG (Non-Bacillus Genus), Other Bacillales; Bc, *B. cereus* group; Bs, *B. subtilis* group; Ob, Other *Bacillus*.

**Sheet 5.** tBlastn results for NprR query against the NCBI Nucleotide collection (nr/nt) database of the *B. cereus* group.

**Sheet 6.** tBlastn results for NprR query against the NCBI Nucleotide collection (nr/nt) database excluding the *B. cereus* group.

### References

1. Neiditch MB, Capodagli GC, Prehna G, Federle MJ. 2017. Genetic and structural analyses of RRNPP intercellular peptide signaling of Gram-positive bacteria. *Annu Rev Genet* 51:311–333.
2. Katoh K, Rozewicki J, Yamada KD. 2019. MAFFT online service: multiple sequence alignment, interactive sequence choice and visualization. *Brief Bioinform* 20:1160–1166.
3. Guindon S, Dufayard JF, Lefort V, Anisimova M, Hordijk W, Gascuel O. 2010. New Algorithms and Methods to Estimate Maximum-Likelihood Phylogenies: Assessing the Performance of PhyML 3.0. *Syst Biol* 59:307–321.
4. Lefort V, Longueville JE, Gascuel O. 2017. SMS: Smart Model Selection in PhyML. *Mol Biol Evol* 34:2422–2424.
5. Anisimova M, Gascuel O. 2006. Approximate likelihood-ratio test for branches: a fast, accurate, and powerful alternative. *Syst Biol* 55:539–552.
6. Altschul SF, Gish W, Miller W, Myers EW, Lipman DJ. 1990. Basic local alignment search tool. *J Mol Biol* 215:403–410.
